# Supplementary material for: Visualization of fast “hydrogen pump” in core–shell nanostructured Mg@Pt through hydrogen-stabilized Mg3Pt
Source: Royal Society of Chemistry journal article supplement (doi:10.1039/c9ta03038g), 2019-01-01
Supplement: c9ta03038g1.pdf [file c9ta03038g1.pdf]

## Supplementary Information

### Visualization of fast “hydrogen pump” in core-shell nanostructured Mg@Pt through hydrogen stabilized Mg<sub>3</sub>Pt

Chong Lu<sup>a,b†</sup>, Yanling Ma<sup>a†</sup>, Fan Li<sup>a</sup>, Hong Zhu<sup>a,d,e</sup>, Xiaoqin Zeng<sup>a,b,c</sup>, Wenjiang  
Ding<sup>a,b,c</sup>, Jianbo Wu<sup>a,c,e\*</sup>, Tao Deng<sup>a,c</sup>, Jianxin Zou<sup>a,b,c\*</sup>

<sup>a</sup> National Engineering Research Center of Light Alloy Net Forming & State Key  
Laboratory of Metal Matrix Composites, Shanghai Jiao Tong University, Shanghai,  
200240, P. R. China

<sup>b</sup> Shanghai Engineering Research Center of Mg Materials and Applications & School  
of Materials Science and Engineering, Shanghai Jiao Tong University, Shanghai,  
200240, P. R. China

<sup>c</sup> Center of Hydrogen Science, Shanghai Jiao Tong University, Shanghai, 200240, P. R.  
China

<sup>d</sup> University of Michigan – Shanghai Jiao Tong University Joint Institute, Shanghai Jiao  
Tong University, 800 Dongchuan Road, Shanghai, 200240, P. R.

<sup>e</sup> Materials Genome Initiative Center, Shanghai Jiao Tong University, 800 Dongchuan  
Road, Shanghai, 200240, P. R.

†these two author contributes equally to this work

## Supplementary Figures:

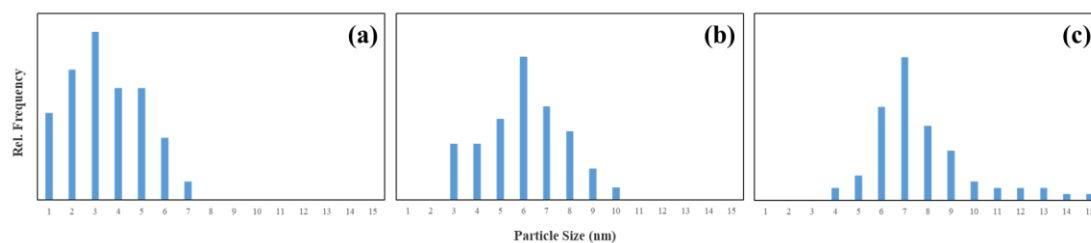

**Figure S1.** The particle size distributions of Pt particles from as-prepared (a), hydrogenated (b) and dehydrogenated (c) of Mg@Pt composites

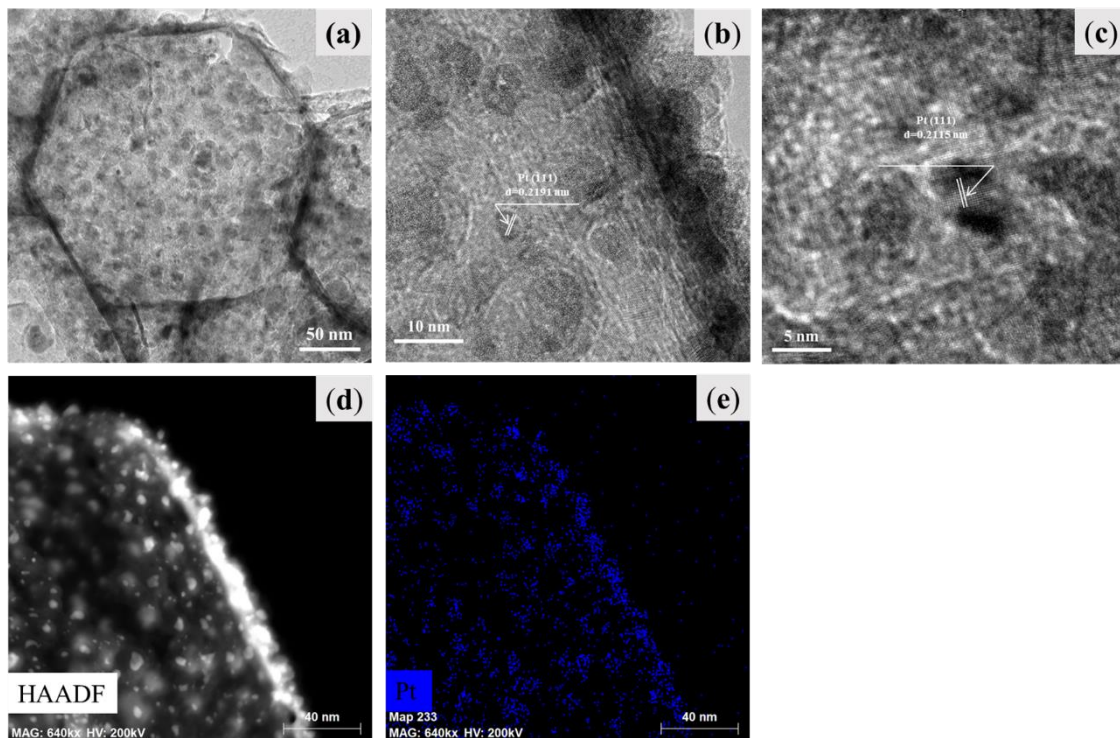

**Figure S2.** TEM (a), HRTEM (b, c) images, HAADF-STEM (d), the corresponding Pt elements map (e) for dehydrogenated Mg@Pt composites

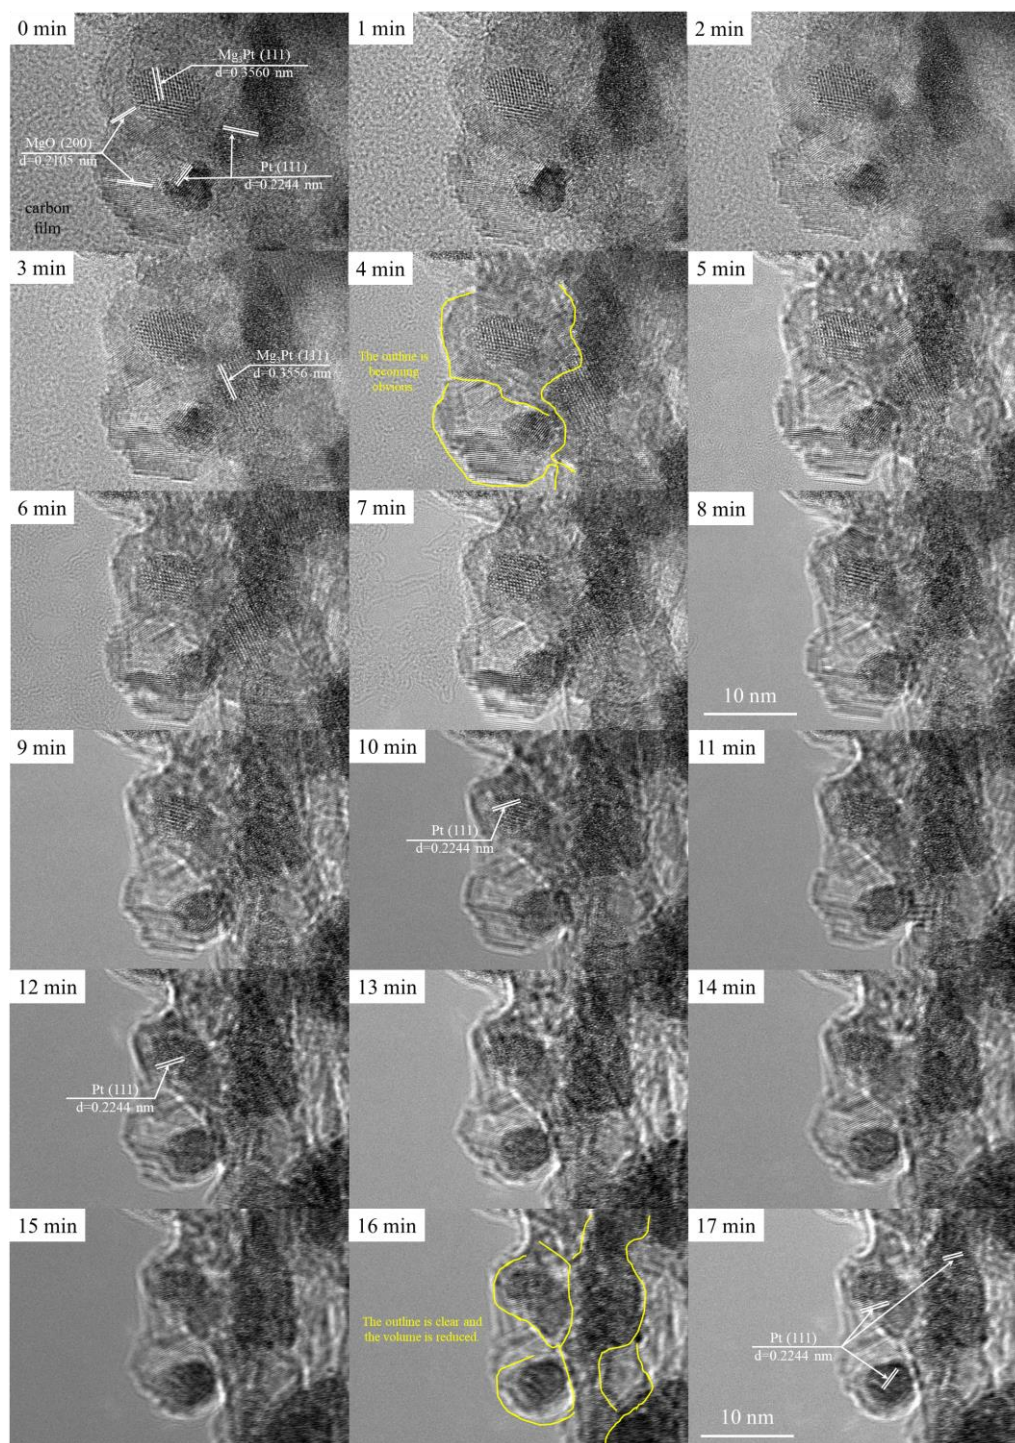

**Figure S3.** HRTEM images with time under electron radiation during the hydrogen desorption process of for the hydrogenated Mg@Pt composite

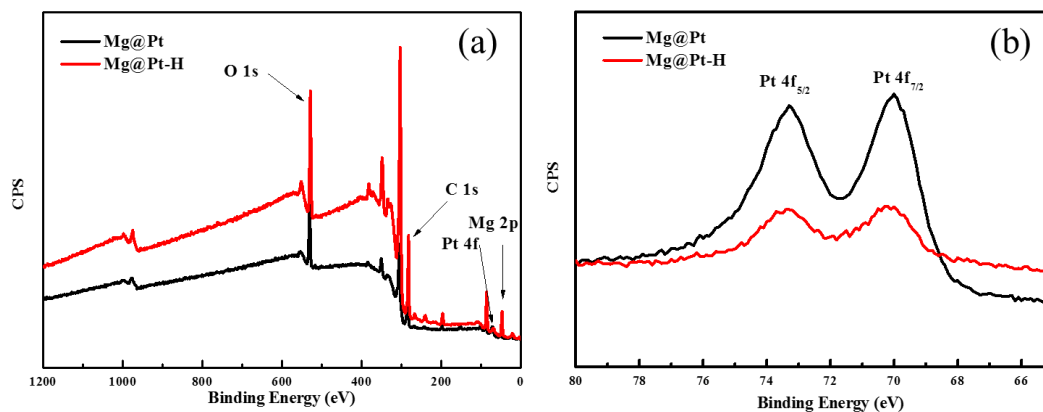

**Figure S4.** XPS survey scan profiles for the as-prepared and hydrogenated Mg@Pt composites (a) and the corresponding Pt 4f XPS spectra (b)

## Supplementary Calculations:

### The fitting for calculation of hydrogen sorption activation energy:

According to the Johnson-Mehl-Avrami-Kolmogorov (JMAK) model described as follows<sup>1</sup>:

$$\ln[-\ln(1-\alpha)]=\eta\ln k+\eta\ln t \quad (1),$$

where  $\alpha$  is the fraction of Mg transformed into MgH<sub>2</sub> at time  $t$ ,  $k$  is an effective kinetic parameter, and  $\eta$  is the Avrami exponent or reaction order. Based on the experimental data obtained at each measured temperature, the fitted line of  $\ln[-\ln(1-\alpha)]$  vs.  $\ln t$  can be drawn, where the values of  $\eta$  (the slope) and  $\eta\ln k$  (the intercept) can be obtained. According to the values of  $k$  at different temperatures, the  $E_a$  for Mg and Mg@Pt can be approximately acquired from the Arrhenius equation:

$$k=A\text{Exp}(-E_a/RT) \quad (2),$$

where  $A$  is a temperature-independent coefficient,  $R$  is the universal gas constant (8.314 J mol<sup>-1</sup> K<sup>-1</sup>), and  $T$  is the absolute temperature. It should be noted that JMAK model is used under the circumstance that a saturated value for hydrogen absorption or desorption is achieved<sup>1</sup>. In our case, some hydrogen absorption/desorption profiles obtained at relatively low temperatures, i.e., absorption at 200°C and desorption at 300°C for pure Mg, absorption at 200°C and desorption at 275°C for Mg@Pt, do not have a saturation point under current measurement conditions and are therefore not considered for the determination of activation energies using the JMAK model. Consequently, the corresponding data points in Figs. 2(e) and 2(f) are absent.

### The calculation condition for defect formation energy:

In view of the interstitial H atom, the ratio of Mg and Pt is always 3 : 1, thus there is no need to calculate the individual potential of Mg and Pt. The known value for formation energy of Mg<sub>3</sub>Pt is 601 meV<sup>2</sup>, which can be got as follows:

$$E_f(Mg_3Pt) = E_{Mg_3Pt} - 3\mu_{Mg} - \mu_{Pt} \quad (3),$$

where  $E_f(Mg_3Pt)$  is the formation energy of Mg<sub>3</sub>Pt and  $E_{Mg_3Pt}$  is the energy of the perfect Mg<sub>3</sub>Pt crystal. With these two formulas provided,  $E_f$  can be simplified to:

$$E_f(T, p) = E_{Mg_3Pt-H} - E_{Mg_3Pt} - E_f(Mg_3Pt) - \mu_H(T, p) \quad (4).$$

With regard to the chemical potential of H atom at finite temperature and pressure, we can calculate it as follows:

$$\mu_H(T, p) = 1/2\mu_{H_2}(T, p) = 1/2\mu_{H_2}(T, p^o) + 1/2kT \ln(p_{H_2}/p^o_{H_2}) \quad (5),$$

where  $\mu_H(T, p)$  and  $\mu_{H_2}(T, p)$  are the H and H<sub>2</sub> chemical potential at finite temperature and pressure, respectively.  $\mu_{H_2}(T, p^o)$  is the chemical potential of hydrogen at one particular pressure,  $p_{H_2}$  is the pressure of hydrogen and  $p^o_{H_2}$  is the particular pressure of hydrogen. Selecting the zero-reference state of  $\mu_{H_2}(0K, p^o)$  as a reference.  $\mu_{H_2}(T, p^o)$  is given using the equation  $G = H - TS$  between the Gibbs free energy, G, and the enthalpy, H, as follows:

$$\begin{aligned} \mu_{H_2}(T, p^o) = \mu_{H_2}(0K, p^o) + \Delta G(\Delta T, p^o, H_2) = \mu_{H_2}(0K, p^o) + (H(T, p^o, H_2) - \\ H(0K, p^o, H_2)) - T(S(T, p^o, H_2) - S(0K, p^o, H_2)) \end{aligned} \quad (6),$$

where we can search these related values in the JANAF thermochemical for standard pressure,  $p^o = 1$  atm. Therefore, we can obtain the aspired temperature dependence simply from the differences in the enthalpy and entropy, S, of an H<sub>2</sub> molecule with respect to the T = 0 K limit.

## Supplementary Table:

**Table S1.** Hydrogen sorption properties of some Mg-based alloys and composites.

| Composites                                                    | Hydrogen Content<br>(wt% H <sub>2</sub> ) | Hydrogen Sorption Activation Energy<br>(kJ/mol H <sub>2</sub> ) |                 | Ref        |
|---------------------------------------------------------------|-------------------------------------------|-----------------------------------------------------------------|-----------------|------------|
|                                                               |                                           | hydrogenation                                                   | dehydrogenation |            |
| CaMg <sub>1.9</sub> Ni <sub>0.1</sub>                         | 5.65                                      | 41.7                                                            | /               | 3          |
| Mg <sub>3</sub> Pr                                            | 2.58                                      | /                                                               | /               | 4          |
| Melt-spun<br>Mg <sub>90</sub> Ce <sub>5</sub> Ni <sub>5</sub> | 5.3                                       | /                                                               | 109.2           | 5          |
| Mg-5wt%Gd                                                     | 5.7                                       | /                                                               | 149             | 6          |
| Mg <sub>17</sub> Ba <sub>2</sub>                              | 4.0                                       | /                                                               | 173.9           | 7          |
| ultrafine Mg                                                  | 7.1                                       | 110.9                                                           | 152.6           | this study |
| Mg@Pt                                                         | 6.5                                       | 84.3                                                            | 152.8           | this study |

**Table S2.** The element compositions obtained from line scanning analysis inserted in Fig. 3 (b4).

| Elements       | Atom (at %) |
|----------------|-------------|
| Magnesium (Mg) | 76.30       |
| Platinum (Pt)  | 23.67       |



**Table S3.** Analysis of bond length before and after H doping in the tetrahedral site and octahedral site, respectively.

| Atom1      | Atom2      | tetrahedral site |               | octahedral site |               |
|------------|------------|------------------|---------------|-----------------|---------------|
|            |            | $L_{ini}$ (Å)    | $L_{dop}$ (Å) | $L_{ini}$ (Å)   | $L_{dop}$ (Å) |
| <b>Mg1</b> | <b>Mg2</b> | 2.98813          | 3.10444       | 3.0189          | 3.03865       |
| <b>Mg2</b> | <b>Mg3</b> | 3.0668           | 3.21168       | 3.1065          | 3.21718       |
| <b>Mg3</b> | <b>Pt</b>  | 2.69813          | 2.76082       | 2.77529         | 2.76948       |
| <b>Pt</b>  | <b>Mg1</b> | 2.77529          | 2.8309        | 3.4182          | 3.50244       |

Notes:  $L_{ini}$ : the bond length before H doping,  $L_{dop}$  (Å): the bond length after H doping.

## Supplementary Reference

1. M. Fanfoni, M. Tomellini, *IL Nuovo Cimento*, 1998; **20**: 1171-1182.
2. De Jong M, Chen W, Angsten T, et al., *Scientific data*, 2015; **2**: 150009
3. M. Ma, R. Duan, L.Z. Ouyang, et al., *J. Alloys Compd.*, 2017, **691**, 929-935.
4. L.Z. Ouyang, X.S. Yang, H.W. Dong, et al., *Scripta Mater.*, 2009, **61**, 339-342.
5. H.J. Lin, L.Z. Ouyang, H. Wang, et al., *Int. J. Hydrogen Energy*, 2012, **37**, 14329-14335.
6. D. Wu, L.Z. Ouyang, C. Wu, et al., *J. Alloys Compd.*, 2015, **642**, 180-184.
7. D. Wu, L.Z. Ouyang, C. Wu, et al., *J. Alloys Compd.*, 2017, **690**, 519-522.
